# Supplementary material for: In trap fragmentation and optical characterization of rotaxanes
Source: Royal Society of Chemistry journal article supplement (doi:10.1039/c0cp00207k), 2010-01-01
Supplement: c0cp00207k.pdf [file c0cp00207k.pdf]

Supporting Information

# In Trap Fragmentation and Optical Characterization of Rotaxanes

*Anouk M. Rijs<sup>†,\*</sup>, Isabelle Compagnon<sup>‡,\*</sup>, Alissa Silva<sup>‡</sup>, Jeffrey S. Hannam<sup>§</sup>, David A.  
Leigh<sup>§,\*</sup>, Euan R. Kay<sup>§</sup> and Philippe Dugourd<sup>‡</sup>.*

FOM Institute for Plasma Physics Rijnhuizen, Edisonbaan 14, 3439 MN Nieuwegein,  
The Netherlands, Université de Lyon, CNRS, UMR5579, LASIM, Université Lyon 1,  
Villeurbanne, France, School of Chemistry, University of Edinburgh, The King's  
Buildings, West Mains Road, Edinburgh EH9 3JJ, United Kingdom.

\* Email: A.M.Rijs@Rijnhuizen.nl, David.L Leigh@ed.ac.uk, Compagnon@lasim.univ-lyon1.fr

† FOM Institute for Plasma Physics Rijnhuizen

‡ Université de Lyon

§ University of Edinburgh

## Table of Contents:

|                                                                                                                                    |    |
|------------------------------------------------------------------------------------------------------------------------------------|----|
| Fig. S1: Chemical structures of the fragmentation products of rotaxane <b>1</b> ,<br>rotaxane <b>2</b> and rotaxane <b>3</b> ..... | S2 |
| Fig. S2: CID spectrum of the 928.5 fragment of rotaxane <b>1</b> .....                                                             | S4 |
| Fig. S3: CID spectra of thread 5 and thread 7 .....                                                                                | S5 |
| Table S1: Absorption maxima.....                                                                                                   | S6 |

| [molecule-H] <sup>+</sup> | fragment | Chemical structure                                                                   |
|---------------------------|----------|--------------------------------------------------------------------------------------|
| Rotaxane 1<br>m/z= 1125.2 | 928.5    | 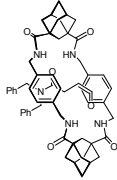   |
|                           | 739.5    |    |
|                           | 477.2    |    |
|                           | 280.3    |   |
| Rotaxane 2<br>m/z= 1009.5 | 812.1    |  |
|                           | 623.4    |  |
|                           | 477.2    |  |
|                           | 280.3    |  |

|                           |                     |  |
|---------------------------|---------------------|--|
| Rotaxane 3<br>m/z= 1143.8 | 940.6 /<br>934.9    |  |
|                           | 649.4               |  |
|                           | 495.4<br>(LID only) |  |

Figure S1: chemical structures of the fragmentation products of rotaxane **1**, rotaxane **2** and rotaxane **3**.

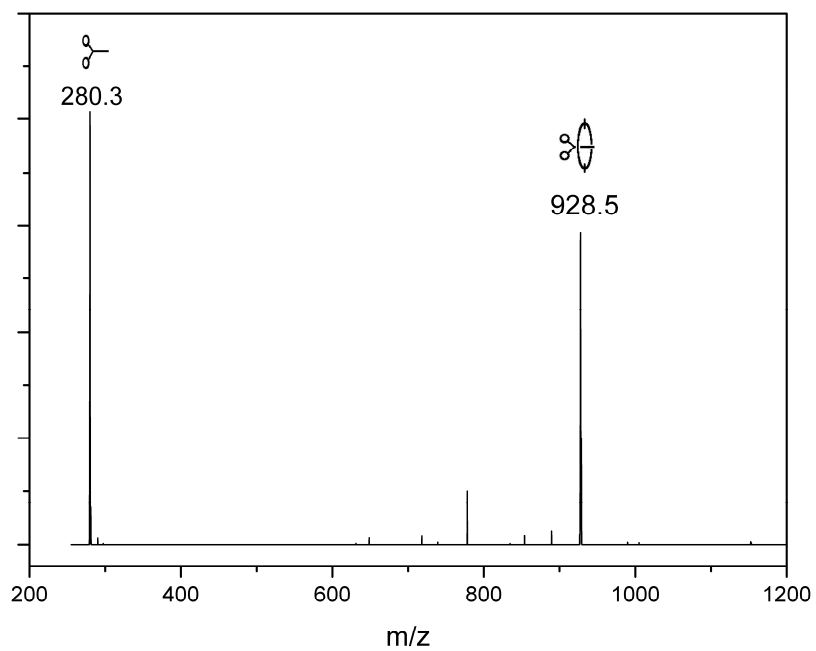

Figure S2: CID spectrum of the 928.5 fragment of rotaxane **1**

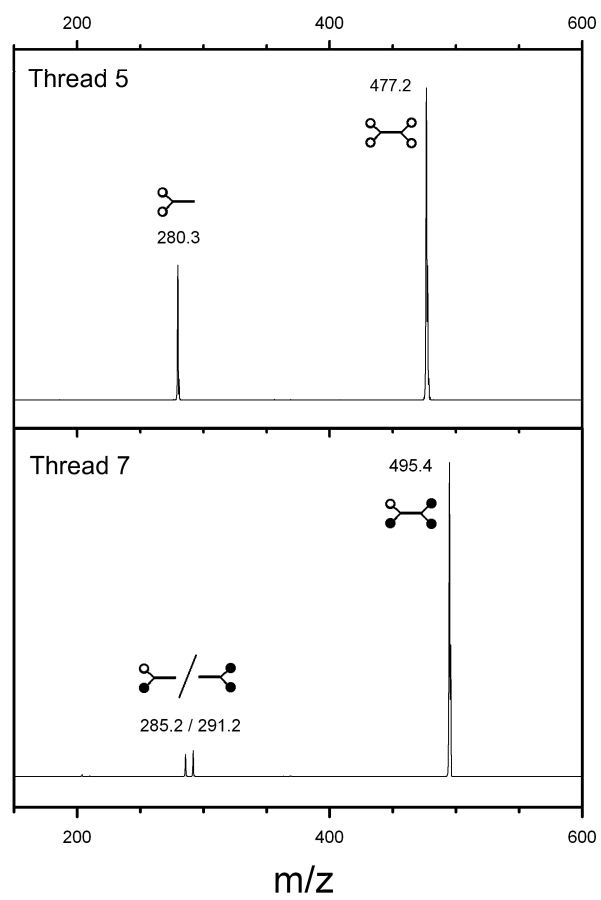

Figure S3: CID spectra of thread 5 and thread 7.

| <b>Rotaxane 1</b>   | <b>Absorption maximum (nm)</b> |
|---------------------|--------------------------------|
| <i>Thread 5</i>     | $\leq 220 \text{ nm}$          |
| <i>Macrocycle 4</i> | $\leq 220 \text{ nm}$          |
| <i>Rotaxane 1</i>   | $\leq 220 \text{ nm}$          |
| <b>Rotaxane 2</b>   |                                |
| <i>Thread 5</i>     | $\leq 220 \text{ nm}$          |
| <i>Macrocycle 6</i> | $228 \text{ nm}$               |
| <i>Rotaxane 1</i>   | $230 \text{ nm}$               |
| <b>Rotaxane 3</b>   |                                |
| <i>Thread 5</i>     | $\leq 220 \text{ nm}$          |
| <i>Macrocycle 4</i> | $\leq 220 \text{ nm}$          |
| <i>Rotaxane 3</i>   | $\leq 220 \text{ nm}$          |

**Table S1: Absorption maxima for all three rotaxanes and their building blocks**
